# Supplementary material for: NF-YB1-regulated expression of sucrose transporters in aleurone facilitates sugar loading to rice endosperm
Source: PubMed Central journal article supplement — Cell Res. 2015 Sep 25;26(3):384–8. doi: 10.1038/cr.2015.116 (PMC4783462; doi:10.1038/cr.2015.116), 2015-09-25
Supplement: cr2015116x2.pdf [file cr2015116x2.pdf]

**A**

*NF-YB1* ATGGCAGGGAACAAAAGCGTGGTGGCAGGAACATGGATCAGGTCAA- GAAGGCGGCAGTGAGATCGGATGGGGT  
*nfyb1-1* ATGGCAGGGAACAAAAGCGTGGTGGCAGGAACATGGATCAGGTCAA- GAAGGCGGCAGTGAGATCGGATGGGGT  
*nfyb1-2* ATGGCAGGGAACAAAAGCGTGGTGGCAGGAACATGGATCAGGTCAA- GAAGGCGGCAGTGAGATCGGATGGGGT

*NF-YB1* GGGAGGTAGTGCACCAACGCCGAGCTGC- CGATGGCCAACCTCGTACGCCTGATAAAGAAGGTGCTCCAGGGA  
*nfyb1-1* GGGAGGTAGTGCACCAACGCCGAGCTGC- CGATGGCCAACCTCGTACGCCTGATAAAGAAGGTGCTCCAGGGA  
*nfyb1-2* GGGAGGTAGTGCACCAACGCCGAGCTGC- CGATGGCCAACCTCGTACGCCTGATAAAGAAGGTGCTCCAGGGA

**B**

*NF-YB1* MAGNKKRGRNMDQVKKA AVRSDGVGGSATNAELPMANL VRL IKKVLPGK AKIGGAAKGLTH  
*nfyb1-1* MAGNKKRGRNMDQVK EGGSEIGWGR\*-----  
*nfyb1-2* MAGNKKRGRNMDQVKKA AVRSDGVGGSATNAEL LDGQPRTPDKEGAPRESEDRGSSQGSHP\*

*NF-YB1* DCAVEFVGFVGD EASEKAKAEHRRTVAPEDYLG SFGDL GFDRYVDPMDAY IHGYREFERAGG  
*nfyb1-1* -----  
*nfyb1-2* -----

*NF-YB1* NRRVAPPPAAATPLTPGGPTFTDAELQFLRSVIPSRSDDEYSGSSPAIGGYGYGYGKNN\*  
*nfyb1-1* -----  
*nfyb1-2* -----

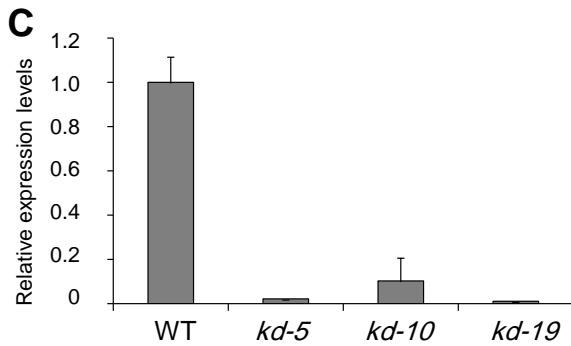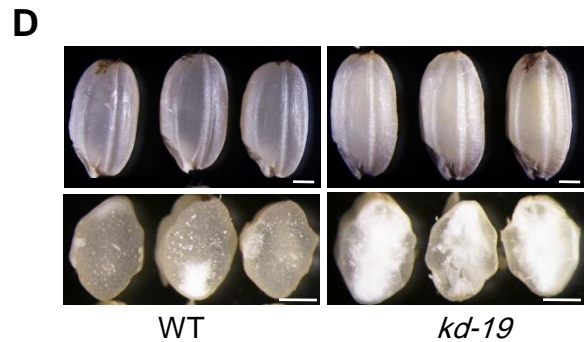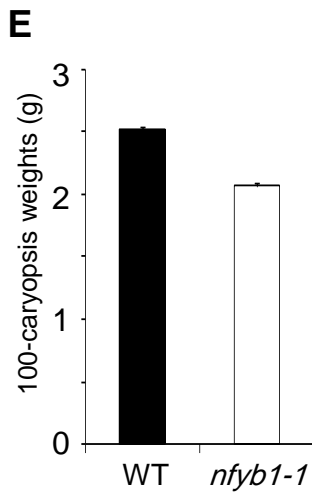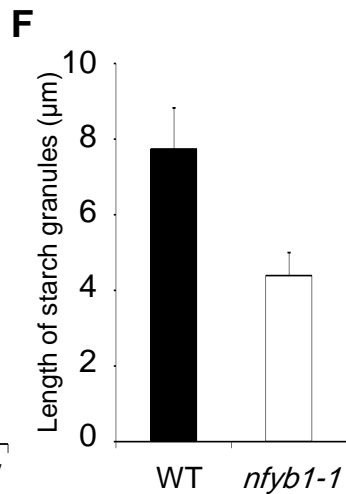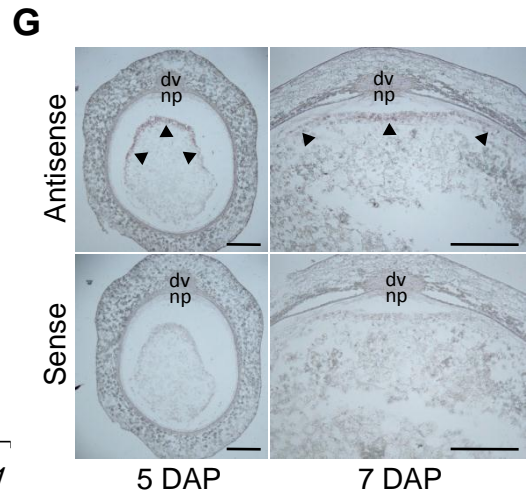

## Figure S2 Genetic analyses of *NF-YB1* gene in rice grain filling.

(A and B) Genomic (A) and polypeptide sequences (B) of *NF-YB1* from the wildtype and *nfyb1-1* and *nfyb1-2* mutants generated using CRISPR-Cas9 technology, showing the presence of an A and a T insertions in *NF-YB1* from *nfyb1-1* and *nfyb1-2* mutants, respectively, leading to truncations of the NF-YB1 protein. \*, stop codon.

(C) Real-time PCR to show that the expression of *NF-YB1* was down-regulated in caryopses collected at 11 DAP from 3 transgenic rice lines (*kd-5*, *kd-10* and *kd-19*) carrying a *pUbi::NF-YB1RNAi*, as compared to that in the wildtype. Data shown as means  $\pm$  SD ( $n = 3$ ,  $P < 0.01$ ).

(D) Down-regulation of *NF-YB1* led to production of rice grains with chalky endosperms. Morphologies of intact (upper panel) and cracked caryopses (lower panel) from the *kd-19* plants carrying *pUbi::NF-YB1RNAi* (right) and wildtype (left). Bars = 1 mm.

(E) Dry weights of 100 mature caryopses from the WT and *nfyb1-1*. Note that caryopses from *nfyb1-1* showed 18% reduction in dry weight. Data are shown as means  $\pm$  SD (100 seeds per sample, repeated 3 times;  $P < 0.01$ ).

(F) The length of starch granules from the WT and *nfyb1-1* endosperms. The average length of WT and *nfyb1-1* starch granules along their long axes. Data are shown as means  $\pm$  SD ( $n = 6$ ,  $P < 0.01$ ).

(G) *In situ* hybridization in caryopses collected at 5 and 7 DAP, showing that *SUT3* is expressed specifically in dorsal aleurone (indicated by arrowhead). Note that no *SUT3* expression in maternal tissues, nor in starchy endosperm. dv, dorsal vascular bundle; np, nucellar projection. Bars = 200  $\mu$ m.
